# Supplementary material for: Behavioral diversity as a potential positive indicator of animal welfare in bottlenose dolphins
Source: PLoS One. 2021 Aug 30;16(8):e0253113. doi: 10.1371/journal.pone.0253113 (PMC8405024; doi:10.1371/journal.pone.0253113)
Supplement: S1 Appendix — (XLSX) [file pone.0253113.s002.xlsx]

## Sheet: Sheet1
Age	Sex	Round 1 Video (Min)	Round 2 Video (Min)
13	Female	86	117
24	Male	182	75
25	Male	135	40
39	Female	267*	235
14	Female	252*	219
19	Male	233	256*
27	Male	187	232
6	Female	27	22
5	Female	24	60
24	Male	338*	324
18	Male	305*	339
3	Female	46	52
16	Female	38	18
11	Male	285*	196
22	Female	277*	172
36	Female	372*	336
15	Female	338*	-
4	Male	-	367*
11	Male	161	215
8	Male	17	61
11	Male	130	96
20	Female	166	43
25	Female	185	194
15	Female	239	163
37	Male	313*	299
6	Female	284*	144
33	Male	251*	247
23	Male	246*	271
39	Male	313*	311
15	Male	261*	302
5	Male	377*	289
22	Male	268*	233
9	Male	29	228
10	Male	343*	332
6	Male	320*	314
16	Male	139	224
33	Male	216	137
7	Female	190	36
14	Male	166	200
11	Male	182	181
6	Female	175	269*
4	Male	158	227
23	Male	307*	321
26	Male	314*	356
9	Female	220	153
10	Female	198	253*
12	Male	256*	141
12	Male	62	145
11	Female	56	307*
14	Male	147	221
21	Male	17	166
17	Female	50	21
5	Male	388*	340
7	Male	246*	216
6	Female	-	106
7	Male	-	76
44	Female	290*	217
15	Female	257*	228
13	Male	90	37
17	Male	98	85
34	Male	198	71
23	Male	197	-
14	Male	331*	318
13	Male	291*	360
11	Male	311*	219
11	Male	278*	268
37	Male	280*	257
41	Female	248*	265
19	Male	82	-
5	Male	124	313*
17	Female	78	-
47	Female	-	274*
17	Female	208	214
28	Female	198	314*
12	Female	97	16
9	Male	137	30
13	Female	374*	347
34	Female	325*	275
23	Female	298*	-
35	Male	308*	-
20	Male	-	208
31	Female	-	321*
13	Male	249*	292
7	Female	325*	-
0	Male	-	201
5	Male	225	288*
* Animal Included in the analysis
