# Supplementary material for: Behavioral diversity as a potential positive indicator of animal welfare in bottlenose dolphins
Source: PLoS One. 2021 Aug 30;16(8):e0253113. doi: 10.1371/journal.pone.0253113 (PMC8405024; doi:10.1371/journal.pone.0253113)
Supplement: S1 Data — (XLSX) [file pone.0253113.s001.xlsx]

## Sheet: Sheet1
Variables		n	Mean	SD	Min	Max	Median
Fecal Cortisol Metabolites (ng/g)		46	185.27	92.0367	16.7574	534.587	178.3
Fecal Aldosterone Metabolites (ng/g)		45	51.6	35.7626	6.04433	125.538	43.51
Cortisol:DHEA Metabolites (ng/g)		46	0.16	0.0903766	0.0224165	0.519268	0.15
Behavioral Diversity		47	0.7	0.307687	0.112585	1.45	0.71
Route Tracing		47	0	0	0	0.03	0
